# Supplementary material for: A Multi-Omics Approach to Liver Diseases: Integration of Single Nuclei Transcriptomics with Proteomics and HiCap Bulk Data in Human Liver
Source: PubMed Central journal article supplement — OMICS. 2020 Apr 13;24(4):180–94. doi: 10.1089/omi.2019.0215 (PMC7185313; doi:10.1089/omi.2019.0215), 2020-04-13
Supplement: Supp_Fig_S1-S2.pdf [file Supp_Fig_S1-S2.pdf]

## Supplementary Data

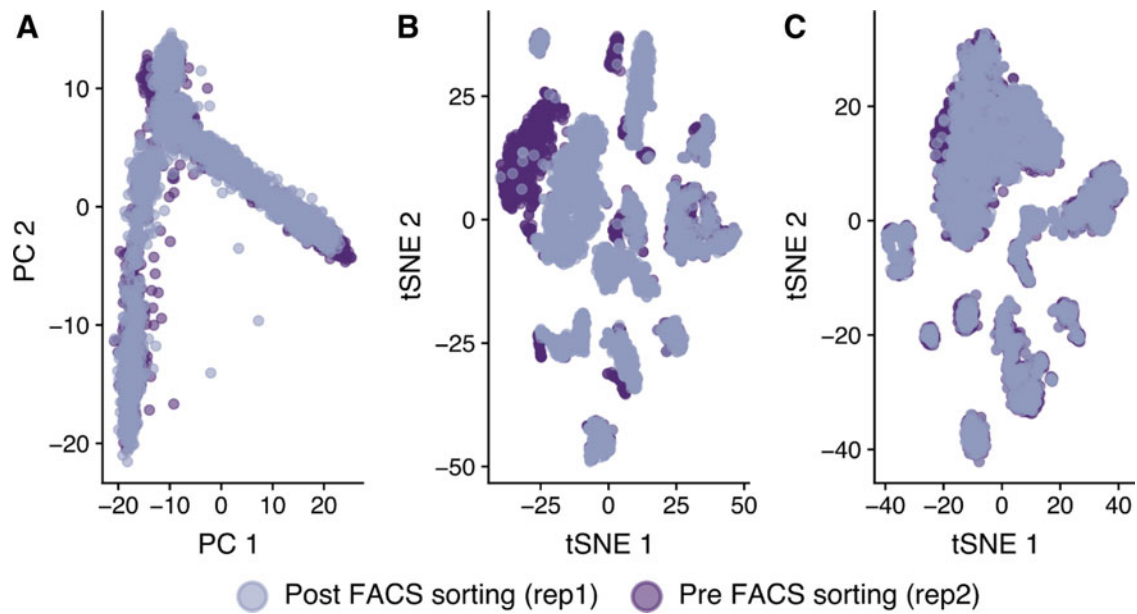

**SUPPLEMENTARY FIG. S1.** Batch effect exploration for replicates. **(A)** PCA plot on uncorrected data for the first two principal components showing batch effect for replicates 1 and 2. **(B)** t-SNE plot (perplexity=30) on uncorrected data showing batch effect for replicates 1 and 2. **(C)** t-SNE plot (perplexity=30) on fastMNN corrected data showing batch effect for replicates 1 and 2. PCA, principal component analysis; t-SNE, t-distributed stochastic neighbor embedding.

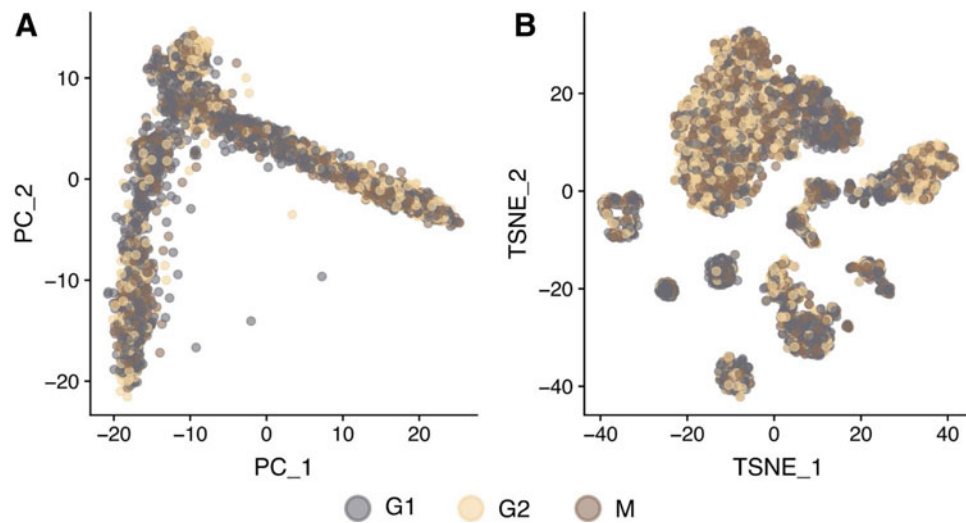

**SUPPLEMENTARY FIG. S2.** Cell cycle effect exploration. **(A)** PCA plot on uncorrected data for the first two principal components showing cell cycle effect. **(B)** t-SNE plot (perplexity=30) on fastMNN corrected data showing cell cycle effect.
