# Supplementary material for: A Multi-Omics Approach to Liver Diseases: Integration of Single Nuclei Transcriptomics with Proteomics and HiCap Bulk Data in Human Liver
Source: PubMed Central journal article supplement — OMICS. 2020 Apr 13;24(4):180–94. doi: 10.1089/omi.2019.0215 (PMC7185313; doi:10.1089/omi.2019.0215), 2020-04-13
Supplement: Supp_Fig_S3.pdf [file Supp_Fig_S3.pdf]

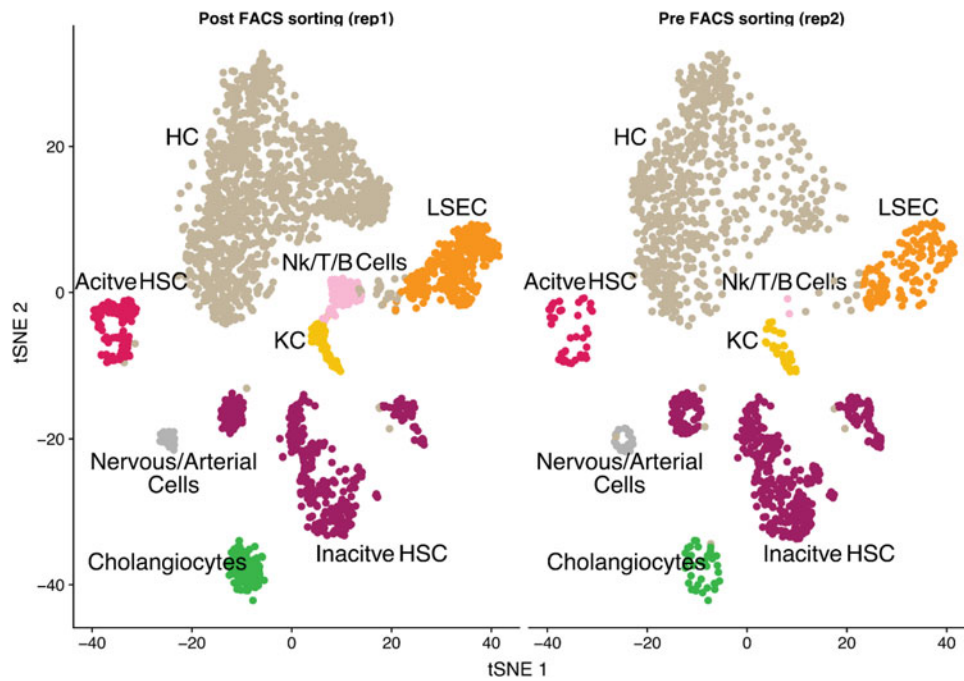

**SUPPLEMENTARY FIG. S3.** Number of nuclei that each replicate contributed. Cell-type clustering with a  $k$ -nearest neighbor graph was set to  $k=50$  using the function `buildSNNGraph` from `scran` (cf. Methods: snRNA-seq—data pre-processing, nuclei clustering, and differential expression) (Lun et al., 2016). snRNA-seq, single-nuclei RNA-seq.

### Supplementary Reference

Lun ATL, McCarthy DJ, and Marioni JC. (2016). A step-by-step workflow for low-level analysis of single-cell RNA-seq data with Bioconductor. *F1000Res* 5, 2122.
