# Supplementary material for: A Multi-Omics Approach to Liver Diseases: Integration of Single Nuclei Transcriptomics with Proteomics and HiCap Bulk Data in Human Liver
Source: PubMed Central journal article supplement — OMICS. 2020 Apr 13;24(4):180–94. doi: 10.1089/omi.2019.0215 (PMC7185313; doi:10.1089/omi.2019.0215), 2020-04-13
Supplement: Supp_Fig_S4.pdf [file Supp_Fig_S4.pdf]

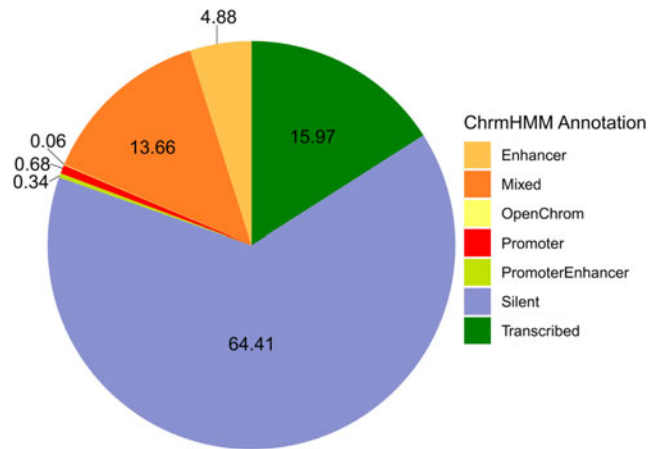

**SUPPLEMENTARY FIG. S4.** ChromHMM annotations for distal elements interacting with promoter probes from HiCap experiments. As “Mixed” are marked elements intersecting at least two different ChromHMM annotations (Supplementary Table S2).
