# Supplementary material for: A Multi-Omics Approach to Liver Diseases: Integration of Single Nuclei Transcriptomics with Proteomics and HiCap Bulk Data in Human Liver
Source: PubMed Central journal article supplement — OMICS. 2020 Apr 13;24(4):180–94. doi: 10.1089/omi.2019.0215 (PMC7185313; doi:10.1089/omi.2019.0215), 2020-04-13
Supplement: Supp_Fig_S5-S6.pdf [file Supp_Fig_S5-S6.pdf]

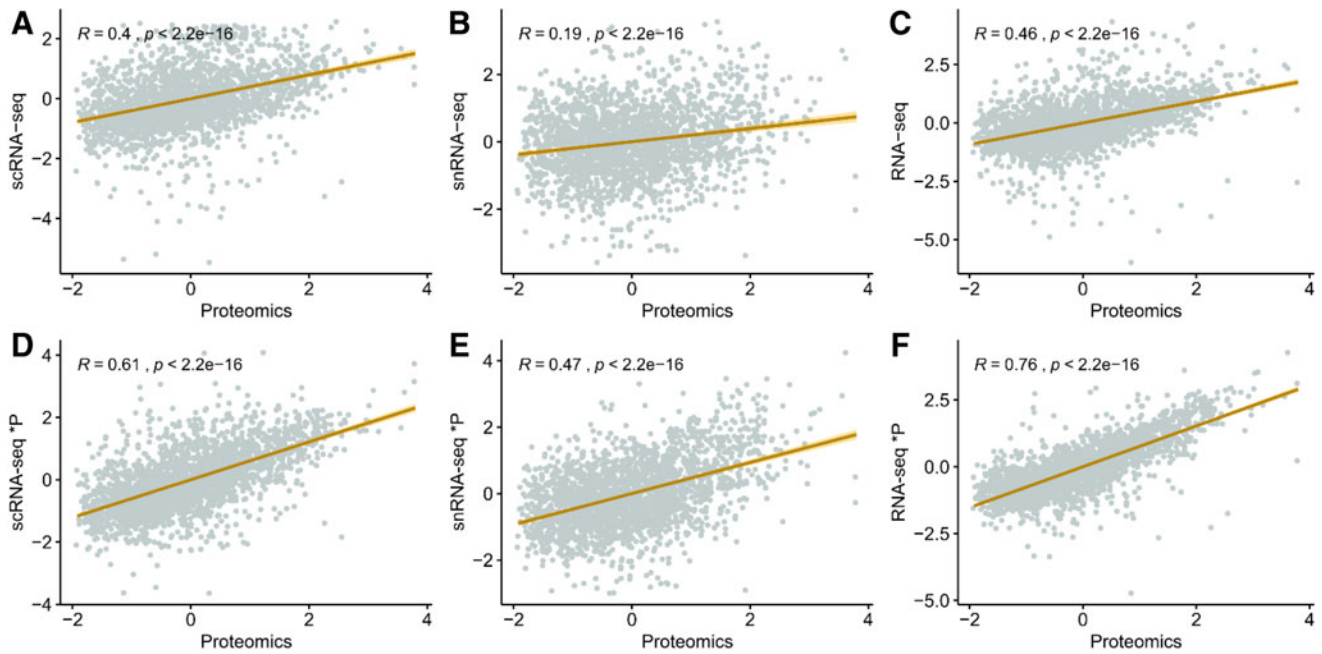

**SUPPLEMENTARY FIG. S5.** Pearson correlation analysis among transcriptomics and MS experiments. (A) Pearson correlation between  $\log_2$ -average *in silico* bulk scRNA-seq from five liver samples and MS proteomics from our study. (B) Pearson correlation between  $\log_2$ -average *in silico* bulk snRNA-seq and MS proteomics from our study. (C) Pearson correlation between  $\log_2$ -average number of reads of bulk RNA-seq from 175 liver samples and MS proteomics from our study. (D) Pearson correlation between  $\log_2$ -average *in silico* bulk scRNA-seq from five liver samples adjusted for gene-specific protein abundance estimation factors and MS proteomics from our study. (E) Pearson correlation between  $\log_2$ -average *in silico* bulk snRNA-seq adjusted for gene-specific protein abundance estimation factors and MS proteomics from our study. (F) Pearson correlation between  $\log_2$ -average number of reads of bulk RNA-seq from 175 liver samples adjusted for gene-specific protein abundance estimation factors and MS proteomics from our study. MS, mass spectrometry.

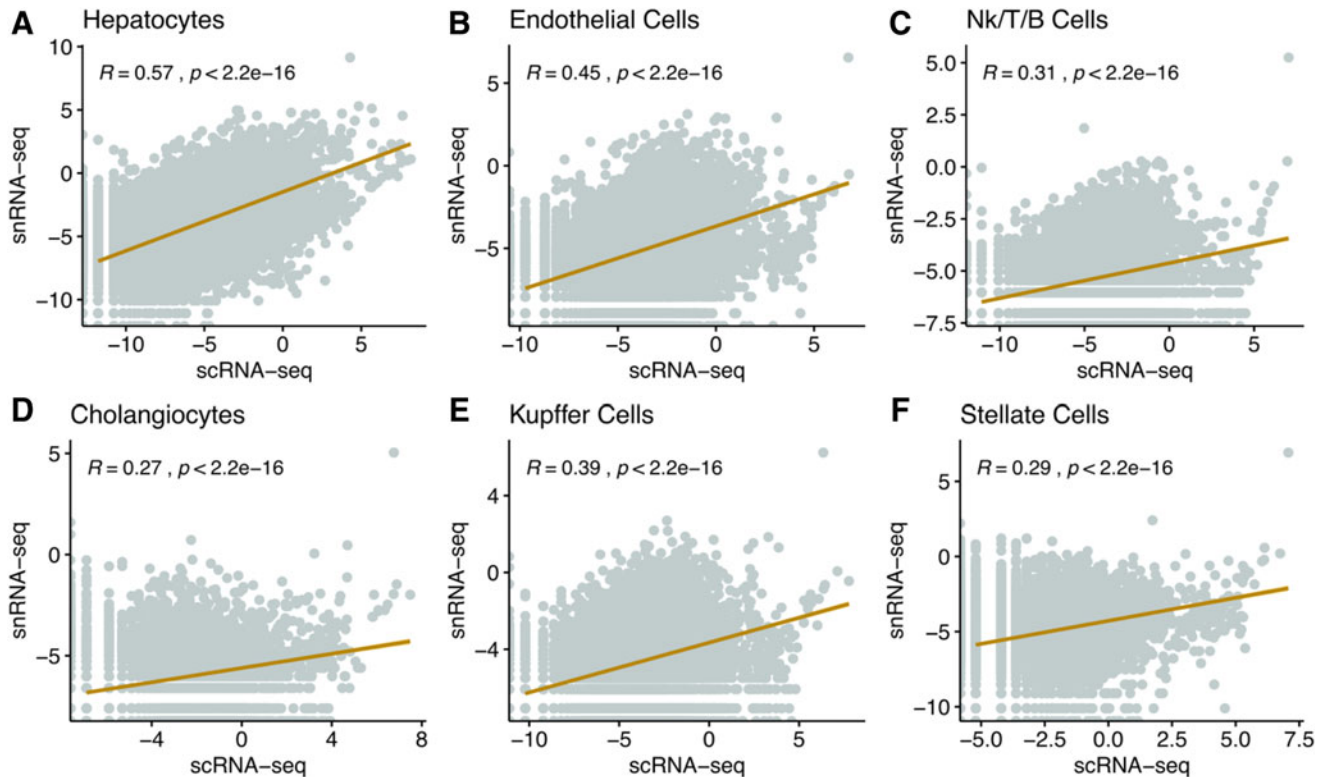

**SUPPLEMENTARY FIG. S6.** Cell type-specific correlation analysis between single-cell and single nuclei liver transcriptomics. Pearson correlation between  $\log_2$ -average *in silico* bulk scRNA-seq and  $\log_2$ -average *in silico* bulk snRNA-seq for shared cell types: (A) hepatocytes; (B) liver sinusoidal endothelial cells; (C) Nk/T/B cells; (D) cholangiocytes; (E) Kupffer cells; and (F) hepatic stellate cells. scRNA-seq, single-cell RNA sequencing.
